# Supplementary material
Source: PubMed Central journal article supplement (PMC8253543)
Supplement: mmc1.pdf [file mmc1.pdf]

# THE LANCET

## Haematology

### Supplementary appendix 1

This translation in Lithuanian was submitted by the authors and we reproduce it as supplied. It has not been peer reviewed. *The Lancet's* editorial processes have only been applied to the original in English, which should serve as reference for this manuscript.

Vertimas lietuvių kalba buvo pateiktas straipsnio autorių ir publikuojamas neredaguotas. Lietuviško teksto peržiūra nebuvo atlikta. *The Lancet* redagavimas buvo taikomas tik tekstui anglų kalba, kuris turėtų būti laikomas pagrindiniu informacijos šaltiniu.

Supplement to: Maneikis K, Šablauskas K, Ringelevičiūtė U, et al. Immunogenicity of the BNT162b2 COVID-19 mRNA vaccine and early clinical outcomes in patients with haematological malignancies in Lithuania: a national prospective cohort study. *Lancet Haematol* 2021; published online July 2. [https://doi.org/10.1016/S2352-3026\(21\)00169-1](https://doi.org/10.1016/S2352-3026(21)00169-1).

## **BNT162b2 mRNA vakcinės imunogeniškumas ir ankstyvos klinikinės išeitys tarp sergančiųjų onkohematologinėmis ligomis Lietuvoje: nacionalinės prospektyvinės kohortos tyrimas**

Kazimieras Maneikis, MD<sup>1,2\*</sup>, Karolis Šablauskas, MD<sup>1,2\*</sup>, Ugnė Ringelevičiūtė, MD<sup>1,2</sup>, Vilmantė Vaitekėnaitė, MD<sup>1,2</sup>, Rita Čekauskienė, MD<sup>1</sup>, Lina Kryžauskaitė, MD<sup>1</sup>, Daniel Naumovas, MS<sup>1</sup>, Valdas Banys, MD PhD<sup>1</sup>, Valdas Pečeliūnas, MD PhD<sup>1,2</sup>, Tumas Beinortas, MBBCh<sup>3,4#</sup>, Prof Laimonas Griškevičius, MD PhD<sup>1,2#</sup>

1 – Hematologijos, onkologijos ir transfuziologijos centras, Vilniaus universiteto ligoninė Santaros klinikos, Vilnius, Lietuva

2 – Klinikinės medicinos institutas, Medicinos fakultetas, Vilniaus universitetas, Vilnius, Lietuva

3 – Department of Haematology, Cambridge University Hospitals NHS trust, Kembridžas, Jungtinė Karalystė

4 – Wellcome - MRC Cambridge Stem Cell Institute, Kembridžas, Jungtinė Karalystė

### **Santrauka**

#### **Įvadas**

Onkohematologinės ligos ir jų gydymas gali turėti įtakos SARS-CoV-2 vakcinų veiksmingumui. Mūsų tikslas buvo įvertinti serologinį atsaką į BNT162b2 vakciną sergantiesiems onkohematologinėmis ligomis ir iširti specifinio gydymo įtaką vakcinės efektyvumui.

#### **Metodai**

Mūsų prospektyvinis nacionalinės kohortos tyrimas vertino serologinį atsaką į pirmąją ir antrąją BNT162b2 vakcinės dozes sergančiųjų onkohematologinėmis ligomis ir sveikų sveikatos apsaugos darbuotojų grupėse. Į tyrimą įtraukti 18 metų ir vyresni, dviem dozėmis paskiepyti asmenys. Kraujo mėginiai ir sveikatos informacija gauti iš Vilniaus universiteto ligoninės Santaros klinikų Biobanko.

„Abbott Architect SARS-CoV-2 IgG Quant II“ chemiluminescentinių mikrodalelių rinkinys buvo naudotas vertinant serumo anti-SARS-CoV-2-S1 imunoglobulino G antikūnų (anti-S1 IgG) koncentracijas 0-10 dienų prieš pirmąją BNT162b2 vakcinės dozę, antrosios imunizacijos dieną (maždaug 21-ąją dieną) ir praėjus 7-21 dienai po antrosios imunizacijos. Informacija apie nepageidaujamus reiškinius gauta tiriamiesiems užpildžius standartinį klausimyną. SARS-CoV-2 infekcijos atvejai po vakcinacijos buvo vertinami kliniškai ir, esant galimybei, atliekant SARS-CoV-2 genotipavimą. Šis tyrimas yra registruotas [ClinicalTrials.gov](https://clinicaltrials.gov) registre (tyrimo numeris NCT04871165).

#### **Rezultatai**

885 sergantieji onkohematologinėmis ligomis buvo įtraukti į tyrimą nuo 2021 m. sausio 8-os dienos iki balandžio 21-os dienos. 857 iš jų nuliniame laiko taške buvo anti-S1 IgG seroneigiami ir sudarė pagrindinę tiriamąją grupę. 315 kraujo onkologinių pacientų buvo 18-60 metų amžiaus ir buvo lyginami su 67 sveikais sveikatos apsaugos darbuotojais. 18-60 metų amžiaus sergantieji onkohematologinėmis ligomis turėjo mažesnę anti-S1 IgG antikūnų medianą po dviejų BNT162b2 vakcinės dozių negu tos pačios amžiaus grupės sveikatos apsaugos darbuotojai (mediana 6961 AU/mL [IQR 1292–20 672] vs 21 395 AU/mL [14 831–33 553];  $p < 0.0001$ ). Lyginant su negydytais onkohematologinėmis ligomis sergančiais asmenimis, pacientų aktyviai gydomų Brutono tirozino kinazės inhibitoriais (BTKi;  $n=44$ ; 0 AU/mL [0–7];  $p < 0.0001$ ), rüksolitinibu ( $n=44$ ; 0 AU/mL [0–7];  $p < 0.0001$ ), venetoklaksu ( $n=10$ ; 4 AU/mL [0–1218];  $p=0.0005$ ) ar anti-CD20 imunoterapija ( $n=87$ ; 17 AU/mL [1–2319];  $p < 0.0001$ ) anti-S1 IgG antikūnų atsakai buvo itin prasti po dviejų BNT162b2 vakcinės dozių. Pacientai gydomi tirozino kinazės inhibitoriais ( $n=41$ ; 10 537 AU/mL [IQR 2335–19 388]) ir pacientai, kuriems taikyta autologinė kamieninių kraujodaros ląstelių transplantacija (KKLT;  $n=192$ ; 6203 AU/mL [1451–16 834]) ar alogeninė KKLT ( $n=122$ ; 6304 AU/mL [1120–16 913]), pasiekė geriausią serologinį atsaką. Devyni SARS-CoV-2 infekcijos atvejai ir trys COVID-19 sąlygotos mirtys buvo stebėtos tarp dviem dozėmis paskiepytų onkohematologinėmis ligomis sergančių asmenų.

## **Išvados**

Po imunizacijos BNT162b2 mRNA vakcina sergantiesiems onkohematologinėmis ligomis formuojasi prastas ir nevienalytis imuninis atsakas. Aktyviai gydomų pacientų, kuriems skiriami BTKi, ruksolitinibas, venetoklaksas ar anti-CD20 imunoterapija, imuninis atsakas yra stipriausiai pažeistas, todėl šie pacientai po vakcinacijos gali likti neapsaugoti nuo SARS-CoV-2 infekcijos.

## **Finansavimas**

Ši studija buvo finansuota Vilniaus universiteto ligoninės Santaros klinikų.
