# Supplementary material
Source: PubMed Central journal article supplement (PMC8253543)
Supplement: mmc2.pdf [file mmc2.pdf]

# THE LANCET

## Haematology

### Supplementary appendix 2

This appendix formed part of the original submission and has been peer reviewed.  
We post it as supplied by the authors.

Supplement to: Maneikis K, Šablauskas K, Ringelevičiūtė U, et al. Immunogenicity of the BNT162b2 COVID-19 mRNA vaccine and early clinical outcomes in patients with haematological malignancies in Lithuania: a national prospective cohort study. *Lancet Haematol* 2021; published online July 2. [https://doi.org/10.1016/S2352-3026\(21\)00169-1](https://doi.org/10.1016/S2352-3026(21)00169-1).

**Manuscript title:****Immunogenicity of the BNT162b2 COVID-19 mRNA vaccine and early clinical outcomes in patients with haematological malignancies in Lithuania: a national prospective cohort study**

Kazimieras Maneikis, MD<sup>1, 2\*</sup>, Karolis Šablauskas, MD<sup>1, 2\*</sup>, Ugnė Ringelevičiūtė, MD<sup>1, 2</sup>, Vilmantė Vaitekėnaitė, MD<sup>1, 2</sup>, Rita Čekauskienė, MD<sup>1</sup>, Lina Kryžauskaitė, MD<sup>1</sup>, Daniel Naumovas, MS<sup>1</sup>, Valdas Banys, MD PhD<sup>1</sup>, Valdas Pečeliūnas, MD PhD<sup>1, 2</sup>, Tumas Beinortas, MBBCh<sup>3, 4#</sup>, Laimonas Griškevičius, MD PhD<sup>1, 2#</sup>

\* these authors contributed equally to the work

# these authors contributed equally to the work

To whom correspondence should be addressed: Kazimieras Maneikis, MD.

Santariškių st. 2, LT-08661, Vilnius, Lithuania. +37068862381. E-mail: kazimieras.maneikis@santa.lt.

1 – Hematology, Oncology and Transfusion Medicine Center, Vilnius University Hospital Santaros Klinikos, Vilnius, Lithuania

2 – Institute of Clinical Medicine, Faculty of Medicine, Vilnius University, Vilnius, Lithuania

3 – Department of Haematology, Cambridge University Hospitals NHS trust, Cambridge, United Kingdom

4 – Wellcome - MRC Cambridge Stem Cell Institute, Cambridge, United Kingdom

**Table of contents**

|                                                                                                                                                                               |    |
|-------------------------------------------------------------------------------------------------------------------------------------------------------------------------------|----|
| Supplementary Table 1. Abbreviations                                                                                                                                          | 2  |
| Supplementary Table 2. Baseline characteristics by haematological malignancy and the most recent treatment.                                                                   | 5  |
| Supplementary Table 3. Baseline characteristics of untreated patients with HMs                                                                                                | 9  |
| Supplementary Table 4. Baseline characteristics of post-splenectomy patients with HMs                                                                                         | 10 |
| Supplementary Table 5. Baseline characteristics of patients with HMs positive for anti-S1 IgG at TP0.                                                                         | 11 |
| Supplementary Table 6. Systemic event grading scale.                                                                                                                          | 12 |
| Supplementary Table 7. Clinical characteristics of fully vaccinated patients with haematological malignancies who contracted COVID-19.                                        | 13 |
| Supplementary Figure 1. Correlation between the anti-S1 IgG level at TP2 and HM patient blood counts, age and sex                                                             | 14 |
| Supplementary Figure 2. Serological response to 1 and 2 doses of BNT162b2 mRNA vaccine across different treatment groups and in healthy individuals.                          | 15 |
| Supplementary Figure 3. Serological response stratified by seroconversion status at TP1                                                                                       | 16 |
| Supplementary Figure 4. Serological response of anti-S1 IgG seropositive HMs at TP0 stratified by anti-N seropositivity at TP0                                                | 17 |
| Supplementary Figure 5. Serological response of HMs with and without SCT and anti-S1 IgG seropositive HMs at TP0                                                              | 18 |
| Supplementary Figure 6. Systemic events reported within 7 days after vaccination with the first and the second dose of BNT162b2 in patients with haematological malignancies. | 19 |

## TABLES

**Supplementary Table 1. Abbreviations.**

|            |                                                                                              |
|------------|----------------------------------------------------------------------------------------------|
| 6MP-MTX    | 6-mercaptopurine, Methotrexate                                                               |
| AA         | Aplastic anemia                                                                              |
| ABVD       | Doxorubicin, Bleomycin, Vinblastine, Dacarbazine                                             |
| ALC        | absolute lymphocyte count                                                                    |
| ALL        | Acute lymphoblastic leukemia                                                                 |
| AML        | Acute myeloid leukemia                                                                       |
| ANC        | absolute neutrophil count                                                                    |
| ATO        | Arsenic trioxide                                                                             |
| ATRA       | All-trans retinoic acid                                                                      |
| AU/mL      | Arbitrary units per millilitre                                                               |
| AVD        | Doxorubicin, Vinblastine, Dacarbazine                                                        |
| B-NHL      | B-Cell Non-Hodgkin lymphoma                                                                  |
| BEACOPP    | Bleomycin, Etoposide, Doxorubicin, Cyclophosphamide, Vincristine, Procarbazine, Prednisolone |
| BEAM       | Carmustine, Etoposide, Cytarabine, Melphalan                                                 |
| BTK        | Bruton's tyrosine kinase                                                                     |
| CEL        | Chronic Eosinophilic Leukemia                                                                |
| CHOP       | Cyclophosphamide, Doxorubicin, Vincristine, Prednisolone                                     |
| CLL        | Chronic lymphocytic leukemia                                                                 |
| CML        | Chronic myeloid leukemia                                                                     |
| CMML       | Chronic myelomonocytic leukemia                                                              |
| CONF       | confidential                                                                                 |
| CTD        | Cyclophosphamide, Thalidomide, Dexamethasone                                                 |
| CdA        | Cladribine                                                                                   |
| CyBorDex   | Cyclophosphamide, Bortezomib, Dexamethasone                                                  |
| DLBCL      | Diffuse Large B-Cell Lymphoma                                                                |
| escBEACOPP | BEACOPP, escalated doses                                                                     |
| ET         | Essential thrombocythemia                                                                    |
| FL         | Follicular lymphoma                                                                          |

|          |                                                 |
|----------|-------------------------------------------------|
| HCM      | hydroxycarbamide                                |
| HCW      | health care workers                             |
| HD-MTX   | High-dose Methotrexate                          |
| HDARA C  | High-dose Cytarabine                            |
| HGB      | hemoglobin                                      |
| HL       | Hodgkin lymphoma                                |
| HLH      | Hemophagocytic lymphohistiocytosis              |
| HiCHOP   | CHOP, escalated doses                           |
| IMiDs    | Immunomodulatory imide drugs                    |
| IRd      | Ixazomib, Lenalidomide, Dexamethasone           |
| KRd      | Carfilzomib, Lenalidomide, Dexamethasone        |
| Kd       | Carfilzomib, Dexamethasone                      |
| LDAraC   | Low-dose Cytarabine                             |
| MAC      | myeloablative conditioning                      |
| MCL      | Mantle cell lymphoma                            |
| MCT      | Mast cell tumor                                 |
| MDS      | Myelodysplastic syndrome                        |
| miniCHOP | CHOP, reduced doses                             |
| MM       | Multiple myeloma                                |
| MMF      | Mycophenolate mofetil                           |
| MTX      | Methotrexate                                    |
| Obi-Chl  | Obinutuzumab, Chlorambucil                      |
| PLT      | platelet count                                  |
| PMF      | Primary myelofibrosis                           |
| PNH      | Paroxysmal nocturnal hemoglobinuria             |
| PV       | Polycythemia vera                               |
| R        | Rituximab                                       |
| R-CD     | Rituximab, Cyclophosphamide, Dexamethasone      |
| R-Chl    | Rituximab, Chlorambucil                         |
| R-Cy     | Rituximab, Cyclophosphamide                     |
| R-DHAP   | Rituximab, Dexamethasone, Cytarabine, Cisplatin |

|         |                                                                                             |
|---------|---------------------------------------------------------------------------------------------|
| R-FC    | Rituximab, Fludarabine, Cyclophosphamide                                                    |
| R-MTX   | Rituximab, Methotrexate                                                                     |
| R-TEDDI | Rituximab, Temozolomide, Etoposide, Liposomal Doxorubicin (Doxil), Dexamethasone, Ibrutinib |
| RIC     | reduced-intensity conditioning                                                              |
| T-NHL   | T-Cell non-Hodgkin lymphoma                                                                 |
| TK      | Tyrosine kinase                                                                             |
| TP      | time point                                                                                  |
| VTd     | Bortezomib, Thalidomide, Dexamethasone                                                      |
| WBC     | White blood cells                                                                           |

**Supplementary Table 2. Baseline characteristics by hematological malignancy and the most recent treatment.**

| Disease         | Treatment                      | N    | Female (%) | Median age, years (range) | Undergoing treatment at the time of vaccination, N (%) | Last treatment <6 months, N (%) | Last treatment 6-12 months, N (%) | Last treatment >12 months, N (%) |
|-----------------|--------------------------------|------|------------|---------------------------|--------------------------------------------------------|---------------------------------|-----------------------------------|----------------------------------|
| ALL             | Allogeneic SCT (RIC)           | 6    | 5 (83)     | 53 (48 - 69)              | 0                                                      | 0                               | 0                                 | 6 (100)                          |
|                 | TK Inhibitors*                 | 4    | 0 (0)      | 32 (24 - 53)              | 3 (75)                                                 | 0                               | 0                                 | 1 (25)                           |
|                 | Allogeneic SCT (MAC)           | 12   | 4 (33)     | 35 (20 - 59)              | 0                                                      | 1 (8)                           | 2 (17)                            | 9 (75)                           |
|                 | Anti CD-20 Monotherapy         | 1    | CONF       | CONF                      | 1 (100)                                                | 0                               | 0                                 | 0                                |
|                 | MTX                            | 4    | 1 (25)     | 25 (23 - 44)              | 1 (25)                                                 | 0                               | 1 (25)                            | 2 (50)                           |
|                 | VCR-Dexa                       | 1    | CONF       | CONF                      | 1 (100)                                                | 0                               | 0                                 | 0                                |
|                 | 6-mercaptopurine, methotrexate | 2    | 2 (100)    | 52 (44 - 61)              | 1 (50)                                                 | 1 (50)                          | 0                                 | 0                                |
| AML             | Allogeneic SCT (MAC)           | 26   | 14 (54)    | 45 (24 - 65)              | 0                                                      | 0                               | 2 (8)                             | 24 (92)                          |
|                 | Allogeneic SCT (RIC)           | 37   | 17 (46)    | 64 (41 - 77)              | 0                                                      | 2 (5)                           | 6 (16)                            | 29 (78)                          |
|                 | Ivosidenib/Placebo             | 2    | 2 (100)    | 51 (50 - 52)              | 2 (100)                                                | 0                               | 0                                 | 0                                |
|                 | Glasdegib+LDARaC               | 3    | 1 (33)     | 72 (60 - 74)              | 2 (67)                                                 | 0                               | 1 (33)                            | 0                                |
|                 | DAC                            | 1    | CONF       | CONF                      | 0                                                      | 1 (100)                         | 0                                 | 0                                |
|                 | HDARaC                         | 2    | 2 (100)    | 64 (64 - 65)              | 0                                                      | 2 (100)                         | 0                                 | 0                                |
|                 | ATO+ATRA                       | 1    | CONF       | CONF                      | 0                                                      | 0                               | 0                                 | 1 (100)                          |
|                 | Immunosuppressants#            | 4    | 3 (75)     | 58 (47 - 70)              | 4 (100)                                                | 0                               | 0                                 | 0                                |
|                 | Venetoclax +/- Other           | 4    | 2 (50)     | 66 (57 - 82)              | 4 (100)                                                | 0                               | 0                                 | 0                                |
|                 | Autologous SCT                 | 3    | 1 (33)     | 39 (35 - 71)              | 0                                                      | 0                               | 0                                 | 3 (100)                          |
|                 | Ruxolitinib                    | 1    | CONF       | CONF                      | 1 (100)                                                | 0                               | 0                                 | 0                                |
| TK Inhibitors** | 1                              | CONF | CONF       | 1 (100)                   | 0                                                      | 0                               | 0                                 |                                  |
| HLH             | Allogeneic SCT (RIC)           | 1    | CONF       | CONF                      | 0                                                      | 1 (100)                         | 0                                 | 0                                |
| CEL             | Immunosuppressants#            | 1    | CONF       | CONF                      | 1 (100)                                                | 0                               | 0                                 | 0                                |
| CMML            | Untreated                      | 1    | CONF       | CONF                      | 0                                                      | 0                               | 0                                 | 0                                |
|                 | Hydroxycarbamide               | 1    | CONF       | CONF                      | 1 (100)                                                | 0                               | 0                                 | 0                                |
| IgG4 Syndrome   | Cyclophosphamide, Prednisolone | 1    | CONF       | CONF                      | 1 (100)                                                | 0                               | 0                                 | 0                                |
| MCT             | Cladribine                     | 1    | CONF       | CONF                      | 1 (100)                                                | 0                               | 0                                 | 0                                |
| CML             | TK Inhibitors*                 | 38   | 10 (26)    | 55 (22 - 86)              | 37 (97)                                                | 0                               | 0                                 | 1 (3)                            |
|                 | Immunosuppressants#            | 1    | CONF       | CONF                      | 1 (100)                                                | 0                               | 0                                 | 0                                |
|                 | Allogeneic SCT (MAC)           | 6    | 3 (50)     | 47 (39 - 56)              | 0                                                      | 0                               | 0                                 | 6 (100)                          |
|                 | Allogeneic SCT (RIC)           | 3    | 3 (100)    | 60 (53 - 64)              | 0                                                      | 0                               | 1 (33)                            | 2 (67)                           |
| ET              | Hydroxycarbamide               | 31   | 23 (74)    | 70 (37 - 89)              | 31 (100)                                               | 0                               | 0                                 | 0                                |
|                 | Anagrelide/Interferon          | 12   | 9 (75)     | 60 (34 - 80)              | 12 (100)                                               | 0                               | 0                                 | 0                                |
|                 | Ruxolitinib                    | 1    | CONF       | CONF                      | 1 (100)                                                | 0                               | 0                                 | 0                                |
|                 | Busulfan                       | 1    | CONF       | CONF                      | 1 (100)                                                | 0                               | 0                                 | 0                                |
|                 | Untreated                      | 1    | CONF       | CONF                      | 0                                                      | 0                               | 0                                 | 0                                |
| MDS             | Allogeneic SCT (RIC)           | 9    | 5 (56)     | 66 (35 - 73)              | 0                                                      | 1 (11)                          | 0                                 | 8 (89)                           |
|                 | Venetoclax +/- Other           | 1    | CONF       | CONF                      | 1 (100)                                                | 0                               | 0                                 | 0                                |
|                 | Allogeneic SCT (MAC)           | 1    | CONF       | CONF                      | 0                                                      | 0                               | 0                                 | 1 (100)                          |
|                 | Untreated                      | 12   | 6 (50)     | 77 (72 - 85)              | 0                                                      | 0                               | 0                                 | 0                                |

|                                             |                                             |                      |         |              |              |         |         |         |
|---------------------------------------------|---------------------------------------------|----------------------|---------|--------------|--------------|---------|---------|---------|
|                                             | IMiDs no Proteasome Inhibitors              | 1                    | CONF    | CONF         | 0            | 0       | 0       | 1 (100) |
| AA                                          | Allogeneic SCT (RIC)                        | 7                    | 2 (29)  | 56 (30 - 70) | 0            | 0       | 0       | 7 (100) |
|                                             | Allogeneic SCT (MAC)                        | 4                    | 3 (75)  | 40 (27 - 44) | 0            | 0       | 0       | 4 (100) |
|                                             | Autologous SCT                              | 108                  | 59 (55) | 66 (46 - 80) | 0            | 6 (6)   | 14 (13) | 88 (81) |
| MM                                          | Allogeneic SCT (RIC)                        | 2                    | 0 (0)   | 50 (41 - 60) | 0            | 0       | 0       | 2 (100) |
|                                             | IMiDs no Proteasome Inhibitors              | 24                   | 12 (50) | 69 (50 - 86) | 16 (67)      | 4 (17)  | 0       | 4 (17)  |
|                                             | Proteasome Inhibitors no IMiDs              | 19                   | 13 (68) | 79 (58 - 93) | 9 (47)       | 3 (16)  | 1 (5)   | 6 (32)  |
|                                             | IMiDs and Proteasome Inhibitors             | 35                   | 25 (71) | 68 (52 - 81) | 26 (75)      | 1 (3)   | 2 (6)   | 6 (17)  |
|                                             | Immunosuppressants#                         | 1                    | CONF    | CONF         | 0            | 1 (100) | 0       | 0       |
|                                             | Allogeneic SCT (MAC)                        | 1                    | CONF    | CONF         | 0            | 0       | 0       | 1 (100) |
|                                             | Untreated                                   | 3                    | 1 (33)  | 61 (44 - 70) | 0            | 0       | 0       | 0       |
|                                             | Anti CD-20 + CHOP***                        | 1                    | CONF    | CONF         | 0            | 0       | 0       | 1 (100) |
|                                             | Bendamustine                                | 1                    | CONF    | CONF         | 0            | 1 (100) | 0       | 0       |
|                                             | Bendamustine, Dexamethasone                 | 1                    | CONF    | CONF         | 1 (100)      | 0       | 0       | 0       |
|                                             | FL                                          | Allogeneic SCT (RIC) | 3       | 2 (67)       | 67 (66 - 67) | 0       | 0       | 1 (33)  |
| Autologous SCT                              |                                             | 16                   | 10 (63) | 62 (43 - 73) | 0            | 0       | 1 (6)   | 15 (94) |
| Untreated                                   |                                             | 5                    | 1 (20)  | 51 (38 - 68) | 0            | 0       | 0       | 0       |
| Anti CD-20 Monotherapy                      |                                             | 3                    | 1 (33)  | 60 (60 - 71) | 2 (67)       | 1 (33)  | 0       | 0       |
| Anti CD-20 Other                            |                                             | 11                   | 5 (45)  | 71 (47 - 89) | 0            | 3 (27)  | 3 (27)  | 5 (45)  |
| Anti CD-20 + CHOP                           |                                             | 6                    | 4 (67)  | 60 (38 - 72) | 0            | 0       | 2 (33)  | 4 (67)  |
| Anti CD-20 + Bendamustine, CdA, fludarabine |                                             | 7                    | 2 (29)  | 73 (67 - 88) | 0            | 2 (29)  | 3 (43)  | 2 (29)  |
| CHOP                                        |                                             | 1                    | CONF    | CONF         | 1 (100)      | 0       | 0       | 0       |
| Venetoclax +/- Other                        |                                             | 1                    | CONF    | CONF         | 1 (100)      | 0       | 0       | 0       |
| DLBCL                                       | Anti CD-20 + CHOP                           | 22                   | 11 (50) | 58 (30 - 86) | 0            | 3 (14)  | 4 (18)  | 15 (68) |
|                                             | Autologous SCT                              | 31                   | 16 (52) | 61 (37 - 74) | 0            | 1 (3)   | 2 (6)   | 28 (90) |
|                                             | Untreated                                   | 4                    | 2 (50)  | 62 (48 - 73) | 0            | 0       | 0       | 0       |
|                                             | Anti CD-20 Monotherapy                      | 4                    | 2 (50)  | 58 (42 - 65) | 0            | 0       | 0       | 4 (100) |
|                                             | Anti CD-20 Other                            | 2                    | 1 (50)  | 59 (47 - 72) | 0            | 0       | 0       | 2 (100) |
|                                             | Allogeneic SCT (RIC)                        | 2                    | 1 (50)  | 61 (61 - 62) | 0            | 0       | 2 (100) | 0       |
|                                             | 6-mercaptopurine, methotrexate              | 1                    | CONF    | CONF         | 0            | 0       | 0       | 1 (100) |
|                                             | HDMtx                                       | 1                    | CONF    | CONF         | 0            | 0       | 0       | 1 (100) |
|                                             | CHOP                                        | 1                    | CONF    | CONF         | 1 (100)      | 0       | 0       | 0       |
|                                             | Immunosuppressants#                         | 1                    | CONF    | CONF         | 1 (100)      | 0       | 0       | 0       |
|                                             | Allogeneic SCT (MAC)                        | 1                    | CONF    | CONF         | 0            | 0       | 0       | 1 (100) |
| CLL                                         | Allogeneic SCT (MAC)                        | 2                    | 0 (0)   | 58 (56 - 60) | 0            | 0       | 0       | 2 (100) |
|                                             | Allogeneic SCT (RIC)                        | 4                    | 1 (25)  | 59 (57 - 71) | 0            | 0       | 0       | 4 (100) |
|                                             | Untreated                                   | 3                    | 1 (33)  | 70 (54 - 73) | 0            | 0       | 0       | 0       |
|                                             | Anti CD-20 + Bendamustine, CdA, fludarabine | 19                   | 7 (37)  | 66 (52 - 79) | 0            | 4 (21)  | 5 (26)  | 10 (53) |
|                                             | BTK Inhibitors                              | 41                   | 19 (46) | 76 (56 - 90) | 39 (95)      | 2 (5)   | 0       | 0       |
|                                             | Venetoclax +/- Other                        | 3                    | 0 (0)   | 61 (60 - 74) | 3 (100)      | 0       | 0       | 0       |
|                                             | Anti CD-20 Other                            | 5                    | 2 (40)  | 75 (71 - 86) | 0            | 1 (20)  | 1 (20)  | 3 (60)  |
|                                             | Hydroxycarbamide                            | 1                    | CONF    | CONF         | 1 (100)      | 0       | 0       | 0       |

|                   |                                             |      |         |              |         |         |         |         |
|-------------------|---------------------------------------------|------|---------|--------------|---------|---------|---------|---------|
|                   | Anti CD-20 + CHOP                           | 1    | CONF    | CONF         | 0       | 0       | 0       | 1 (100) |
| MCL               | Anti CD-20 Monotherapy                      | 4    | 1 (25)  | 70 (66 - 75) | 1 (25)  | 2 (50)  | 1 (25)  | 0       |
|                   | Autologous SCT                              | 6    | 3 (50)  | 66 (62 - 71) | 0       | 0       | 0       | 6 (100) |
|                   | Venetoclax +/- Other                        | 1    | CONF    | CONF         | 1 (100) | 0       | 0       | 0       |
|                   | BTK Inhibitors                              | 3    | 0 (0)   | 76 (59 - 79) | 3 (100) | 0       | 0       | 0       |
|                   | Untreated                                   | 1    | CONF    | CONF         | 0       | 0       | 0       | 0       |
| T-NHL             | Autologous SCT                              | 17   | 10 (59) | 51 (36 - 69) | 0       | 0       | 1 (6)   | 16 (94) |
|                   | Allogeneic SCT (MAC)                        | 1    | CONF    | CONF         | 0       | 0       | 0       | 1 (100) |
|                   | Ruxolitinib****                             | 1    | CONF    | CONF         | 1 (100) | 0       | 0       | 0       |
|                   | Cyclophosphamide                            | 1    | CONF    | CONF         | 1 (100) | 0       | 0       | 0       |
| HL                | Autologous SCT                              | 19   | 12 (63) | 40 (26 - 64) | 0       | 0       | 3 (16)  | 16 (84) |
|                   | Anti CD-20 + Bendamustine, CdA, fludarabine | 1    | CONF    | CONF         | 1 (100) | 0       | 0       | 0       |
|                   | Untreated                                   | 3    | 1 (33)  | 62 (19 - 66) | 0       | 0       | 0       | 0       |
|                   | Vinblastine                                 | 1    | CONF    | CONF         | 1 (100) | 0       | 0       | 0       |
|                   | BEAM                                        | 1    | CONF    | CONF         | 1 (100) | 0       | 0       | 0       |
|                   | ABVD                                        | 8    | 7 (88)  | 28 (19 - 46) | 0       | 3 (38)  | 1 (13)  | 4 (50)  |
|                   | BEACOPP                                     | 3    | 2 (67)  | 34 (25 - 40) | 0       | 0       | 0       | 3 (100) |
|                   | escBEACOPP                                  | 4    | 1 (25)  | 51 (41 - 60) | 0       | 0       | 2 (50)  | 2 (50)  |
|                   | AVD                                         | 1    | CONF    | CONF         | 0       | 0       | 0       | 1 (100) |
|                   | Nivolumab                                   | 3    | 2 (67)  | 35 (33 - 43) | 2 (67)  | 0       | 0       | 1 (33)  |
| Anti CD-20 + CHOP | 1                                           | CONF | CONF    | 0            | 0       | 0       | 1 (100) |         |
| B-NHL Other       | Autologous SCT                              | 2    | 1 (50)  | 50 (41 - 60) | 0       | 0       | 0       | 2 (100) |
|                   | Cladribine                                  | 1    | CONF    | CONF         | 0       | 0       | 1 (100) | 0       |
|                   | Anti CD-20 Monotherapy                      | 1    | CONF    | CONF         | 0       | 1 (100) | 0       | 0       |
| PMF               | Anagrelide/Interferon                       | 1    | CONF    | CONF         | 1 (100) | 0       | 0       | 0       |
|                   | Hydroxycarbamide                            | 31   | 23 (74) | 72 (62 - 87) | 30 (97) | 0       | 1 (3)   | 0       |
|                   | Ruxolitinib                                 | 9    | 5 (56)  | 65 (51 - 79) | 9 (100) | 0       | 0       | 0       |
|                   | IMiDs no Proteasome Inhibitors              | 1    | CONF    | CONF         | 1 (100) | 0       | 0       | 0       |
|                   | Untreated                                   | 1    | CONF    | CONF         | 0       | 0       | 0       | 0       |
| PV                | Ruxolitinib                                 | 4    | 2 (50)  | 69 (62 - 71) | 4 (100) | 0       | 0       | 0       |
|                   | Hydroxycarbamide                            | 84   | 50 (60) | 69 (36 - 82) | 83 (99) | 0       | 0       | 1 (1)   |
|                   | Anagrelide/Interferon                       | 3    | 2 (67)  | 70 (43 - 88) | 3 (100) | 0       | 0       | 0       |
|                   | Untreated                                   | 19   | 7 (37)  | 52 (27 - 80) | 0       | 0       | 0       | 0       |

B-NHL Other - Burkitt lymphoma and Hairy cell leukemia

T-NHL - Peripheral T-cell lymphoma, Anaplastic large cell lymphoma, Angioimmunoblastic T-cell lymphoma

\* - Imatinib; Dasatinib; Nilotinib

\*\* - Gilteritinib

\*\*\* - the patient received autologous SCT for MM and R-CHOP for post-transplant lymphoproliferative disorder

\*\*\*\* - ruxolitinib for GvHD treatment

# - Patients receiving standard immunosuppression after allogeneic stem cell transplantation were included in the "Allogeneic SCT" group. Patients receiving immunosuppressive therapy for chronic graft versus host disease or other diseases were included in the "Immunosuppressants" group.



| <b>Treatment regimens:</b>             |                                                                                                        |
|----------------------------------------|--------------------------------------------------------------------------------------------------------|
| IMiD with Proteasome Inhibitor         | VTd; KRd; IRd                                                                                          |
| IMiD without Proteasome Inhibitor      | CTD; Lenalidomide, Dexamethasone; Pomalidomide, Dexamethasone; Thalidomide, Prednisolone; Lenalidomide |
| Proteasome Inhibitor without IMiD      | Kd; CyBorDex                                                                                           |
| Anti CD-20 with CHOP                   | R-CHOP; R-miniCHOP; R-HiCHOP                                                                           |
| Anti CD-20 Other                       | R-DHAP; R-TEDDI; R-MTX; R-FC; R-Cy; R-CD; R-Chl; Obi-Chl                                               |
| BTKi                                   | Ibrutinib; Acalabrutinib                                                                               |
| Other Systemic Therapy                 | Cladribine; Bendamustine; Vinblastine; Cyclophosphamide, Prednisolone; Vincristine, Dexamethasone      |
|                                        | Bendamustine, Dexamethasone; Busulfan; 6MP-MTX; MTX; HD-MTX; CHOP; BEAM; BEACOPP; escBEACOPP           |
|                                        | ABVD; AVD; HDARaC; Decitabine; ATO, ATRA; Glasdegib, LDARaC; Ivosidenib or Placebo                     |
| TK Inhibitors                          | Imatinib; Dasatinib; Nilotinib; Gilteritinib                                                           |
| Immunosuppressants                     | Methylprednisolone; Prednisolone; Dexamethasone; Budesonide; MMF; MMF, Methylprednisolone              |
| Venetoclax with or without other drugs | Venetoclax; Venetoclax, Decitabine; Venetoclax, Azacitidine                                            |
|                                        | Venetoclax, LDARaC; Venetoclax, LDARaC, Gilteritinib; Venetoclax, Ibrutinib                            |

**Supplementary Table 3. Baseline characteristics of untreated patients with HMs.**

| <b>Disease</b> | <b>N</b> | <b>Female (%)</b> | <b>Median age, years (range)</b> |
|----------------|----------|-------------------|----------------------------------|
| CLL            | 3        | 1 (33)            | 70 (54 - 73)                     |
| CMML           | 1        | CONF              | CONF                             |
| DLBCL          | 4        | 2 (50)            | 62 (48 - 73)                     |
| FL             | 6        | 1 (17)            | 55 (38 - 68)                     |
| HL             | 3        | 1 (33)            | 63 (19 - 66)                     |
| MCL            | 1        | CONF              | CONF                             |
| MDS            | 12       | 6 (50)            | 77 (72 - 85)                     |
| MM             | 3        | 1 (33)            | 61 (44 - 70)                     |
| PV             | 19       | 7 (37)            | 66 (27 - 80)                     |
| ET             | 1        | CONF              | CONF                             |

**Supplementary Table 4. Baseline characteristics of post-splenectomy patients with HMs.**

| Patient | Last treatment    | Time from last treatment (mos.) | Time from splenectomy (yrs.) | Median anti-S1 IgG at TP0 (range) (AU/mL) | Median anti-S1 IgG at TP1 (range) (AU/mL) | Median anti-S1 IgG at TP2 (range) (AU/mL) |
|---------|-------------------|---------------------------------|------------------------------|-------------------------------------------|-------------------------------------------|-------------------------------------------|
| 1       | AlloSCT           | >24                             | 36                           | 0.7                                       | 201.6                                     | 8021.4                                    |
| 2       | AlloSCT           | >24                             | 15                           | 0                                         | 1173.9                                    | 4955.1                                    |
| 3       | BTKi              | -                               | 6                            | 4.4                                       | 0.1                                       | 0                                         |
| 4       | Anti-CD20 + Chemo | >12                             | 1                            | 1.6                                       | 21.3                                      | 4283.6                                    |
| 5       | ABVD              | >12                             | 3                            | 9.6                                       | n/a                                       | 273.3                                     |

**Supplementary Table 5. Baseline characteristics of patients with HMs positive for anti-S1 IgG at TP0.**

| <b>Treatment</b>                   | <b>N</b> | <b>Female N (%)</b> | <b>Median age, years (range)</b> | <b>Undergoing treatment at the time of vaccination, N (%)</b> | <b>Last treatment &lt;6 months, N (%)</b> | <b>Last treatment 6-12 months, N (%)</b> | <b>Last treatment &gt;12 months, N (%)</b> |
|------------------------------------|----------|---------------------|----------------------------------|---------------------------------------------------------------|-------------------------------------------|------------------------------------------|--------------------------------------------|
| HM anti-S1 IgG seropositive at TP0 | 28       | 15 (54)             | 60 (22 - 85)                     | 9 (32)                                                        | 1 (4)                                     | 2 (7)                                    | 16 (57)                                    |
| Autologous SCT                     | 10       | 7 (70)              | 63 (33 - 69)                     | 0                                                             | 0                                         | 1 (9)                                    | 9 (90)                                     |
| Allogeneic SCT                     | 6        | 3 (50)              | 48 (35 - 63)                     | 0                                                             | 0                                         | 1 (17)                                   | 5 (83)                                     |
| MAC                                | 5        | 3 (60)              | 44 (35 - 63)                     | 0                                                             | 0                                         | 1 (20)                                   | 4 (80)                                     |
| RIC                                | 1        | CONF                | CONF                             | 0                                                             | 0                                         | 0                                        | 1 (100)                                    |
| TK Inhibitors                      | 2        | 0 (0)               | 40 (22 - 59)                     | 2 (100)                                                       | 0                                         | 0                                        | 0                                          |
| IMiDs AND/OR Proteasome Inhibitor  | 4        | 2 (50)              | 61 (57 - 85)                     | 3 (75)                                                        | 0                                         | 0                                        | 1 (25)                                     |
| Hydroxycarbamide                   | 2        | 2 (100)             | 65 (60 - 69)                     | 1 (100)                                                       | 0                                         | 0                                        | 0                                          |
| Anti-CD20 Monotherapy              | 2        | 0 (0)               | 68 (65 - 71)                     | 1 (50)                                                        | 1 (50)                                    | 0                                        | 0                                          |
| Nivolumab                          | 1        | CONF                | CONF                             | 1 (100)                                                       | 0                                         | 0                                        | 0                                          |
| Other Systemic Therapy             | 1        | CONF                | CONF                             | 0                                                             | 0                                         | 0                                        | 1 (100)                                    |

**Supplementary Table 6. Systemic event grading scale.**

| <b>Systemic reaction</b> | <b>Mild (Grade 1)</b>            | <b>Moderate (Grade 2)</b>       | <b>Severe (Grade 3)</b>            | <b>Potentially Life-Threatening (Grade 4)</b>                  |
|--------------------------|----------------------------------|---------------------------------|------------------------------------|----------------------------------------------------------------|
| Vomiting                 | 1-2 times in 24 hours            | >2 times in 24 hours            | Requires IV hydration              | Emergency room visit or hospitalization for hypotensive shock  |
| Diarrhea                 | 2 to 3 loose stools in 24 hours  | 4 to 5 loose stools in 24 hours | 6 or more loose stools in 24 hours | Emergency room visit or hospitalization for severe diarrhea    |
| Fever                    | 38.0°C – 39.0°C                  | 39.1°C – 40.0°C                 | >40.0°C                            | Emergency room visit or hospitalization for severe fever       |
| Chills                   | Does not interfere with activity | Some interference with activity | Prevents daily routine activity    | Emergency room visit or hospitalization for severe chills      |
| Fatigue                  | Does not interfere with activity | Some interference with activity | Prevents daily routine activity    | Emergency room visit or hospitalization for severe fatigue     |
| Headache                 | Does not interfere with activity | Some interference with activity | Prevents daily routine activity    | Emergency room visit or hospitalization for severe headache    |
| Muscle pain              | Does not interfere with activity | Some interference with activity | Prevents daily routine activity    | Emergency room visit or hospitalization for severe muscle pain |
| Joint pain               | Does not interfere with activity | Some interference with activity | Prevents daily routine activity    | Emergency room visit or hospitalization for severe joint pain  |

**Supplementary Table 7. Clinical characteristics of fully vaccinated patients with haematological malignancies who contracted COVID-19**

| Haematological malignancy (Time since diagnosis) | Disease status at first immunisation | Last HM treatment (months) | Current or last treatment administered | No of treatment lines at the time of first immunisation             | TP2 anti-S1 IgG (AU/mL) | Days from second immunisation to SARS-CoV-2 positive PCR | SARS-CoV-2 PCR nadir CT values | SARS-CoV-2 genotype        | COVID-19 symptoms                                  | anti-S1 IgG (AU/mL) on hospitalisation day | COVID-19 treatment                                                              | COVID severity                                  |
|--------------------------------------------------|--------------------------------------|----------------------------|----------------------------------------|---------------------------------------------------------------------|-------------------------|----------------------------------------------------------|--------------------------------|----------------------------|----------------------------------------------------|--------------------------------------------|---------------------------------------------------------------------------------|-------------------------------------------------|
| AML (2.0 years)                                  | CR                                   | >12                        | alloSCT                                | 2 [1. FLAG-IdA<br>2. alloSCT with DLI]                              | 6212.8                  | 49                                                       | 22                             | N501Y + Del69-70 + E484K - | Fever, dyspnea                                     | 5071.1                                     | Dexamethasone, Remdesivir, Low-flow oxygen therapy                              | Hospitalized, requiring supplemental oxygen     |
| CLL (2.6 years)                                  | Active disease                       | <3                         | Ibrutinib                              | 1                                                                   | 2.7                     | 72                                                       | 16                             | N501Y + Del69-70 + E484K - | Fever, dyspnea, pneumonitis, respiratory failure   | N/A                                        | Dexamethasone, High-flow oxygen therapy                                         | Death from COVID-19 (4 days from diagnosis)     |
| CLL (17.0 years)                                 | CR                                   | <3                         | Ibrutinib                              | 2 [1. chlorambucil<br>2. ibrutinib]                                 | 1635.3                  | 40                                                       | 19                             | N501Y + Del69-70 + E484K - | None                                               | 813.9                                      | None                                                                            | Not hospitalized, no limitations on activities  |
| CLL (13.5 years)                                 | PR                                   | Active                     | Venetoclax                             | 4 [1. FluCy<br>2. Obinutuzumab-FC<br>3. Ibrutinib<br>4. Venetoclax] | 0                       | 33                                                       | 15                             | N501Y + Del69-70 + E484K - | Fatigue, fever, dyspnea, pneumonitis               | 0                                          | Dexamethasone, Remdesivir, Convalescent plasma therapy, Low-flow oxygen therapy | Hospitalized, requiring supplemental oxygen     |
| MCL (1.7 years)                                  | CR                                   | Active                     | Rituximab                              | 3 [1. R-CHOP<br>2. autoSCT<br>3. Rituximab]                         | 0                       | 59                                                       | N/A                            | N/A                        | Fatigue, fever, cough, nausea, pneumonitis         | 0                                          | Dexamethasone, Remdesivir, Convalescent plasma therapy, Low-flow oxygen therapy | Hospitalized, requiring supplemental oxygen     |
| MCL (1.3 years)                                  | CR                                   | Active                     | Ibrutinib                              | 2 [1. R-mini-CHOP/R-Arac-C<br>2. Ibrutinib]                         | 3.2                     | 36                                                       | N/A                            | N/A                        | Fatigue, dyspnea, pneumonitis, respiratory failure | N/A                                        | Dexamethasone, mechanical ventilation                                           | Death from COVID-19 (6 days from diagnosis)     |
| AL amyloidosis (11 months)                       | Active disease                       | Active                     | No specific treatment                  | 0 [VTD started 2 weeks after vaccination]                           | 1138.2                  | 32                                                       | 8                              | N501Y + Del69-70 +         | Fatigue, dyspnea, pneumonia, respiratory failure   | N/A                                        | Dexamethasone, Remdesivir, Low-flow oxygen therapy                              | Death from COVID-19 (26 days from diagnosis)    |
| MM (8 months)                                    | VGPR                                 | Active                     | CyBorDex                               | 1                                                                   | 0                       | 30                                                       | 13                             | N501Y + Del69-70 + E484K - | Fatigue, dyspnea                                   | N/A                                        | None                                                                            | Not hospitalized, no limitations on activities  |
| HCL (16.3 years)                                 | Relapsed disease                     | >6                         | Cladribine                             | 2 [1. Interferon-alpha<br>2. Cladribine]                            | 5.5                     | 86                                                       | 15                             | N501Y + Del69-70 + E484K - | Fatigue, fever, dyspnea                            | 257.4                                      | None                                                                            | Hospitalized, not requiring supplemental oxygen |

Abbreviations can be found in Supplementary Table 1. N501Y, del 69-70 and E484K correspond to specific mutations in SARS-CoV-2 spike protein sequence. N501Y positive del 69-70 positive and E484K negative SARS-CoV-2 cases correspond to B.1.1.7 lineage, which was dominant in Lithuania between February and May, 2021.

## FIGURES

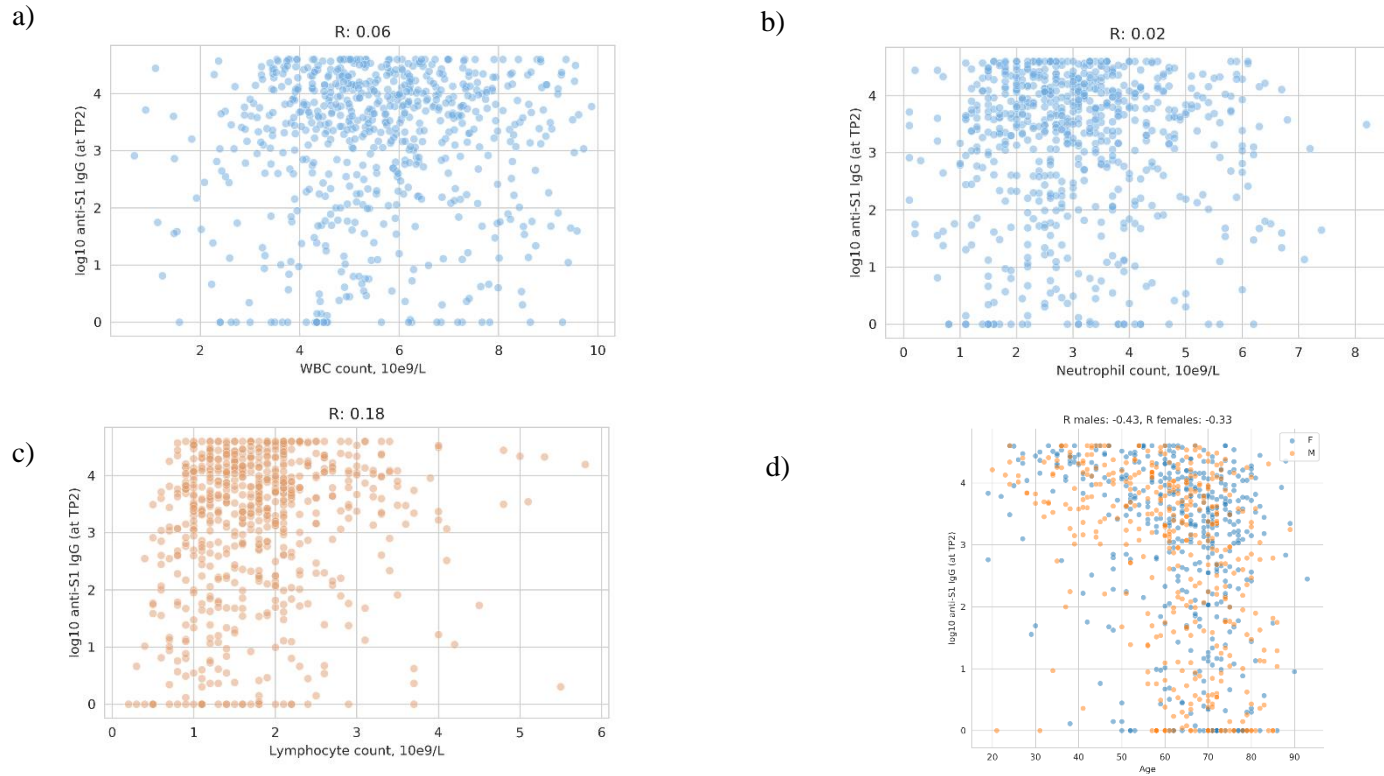

**Supplementary Figure 1. Correlation between the anti-S1 IgG level at TP2 and HM patient blood counts, age and sex**

a) prevaccination WBC b) prevaccination neutrophil count c) prevaccination lymphocyte count d) age and sex  
R above the subfigures is Spearman's correlation coefficient.

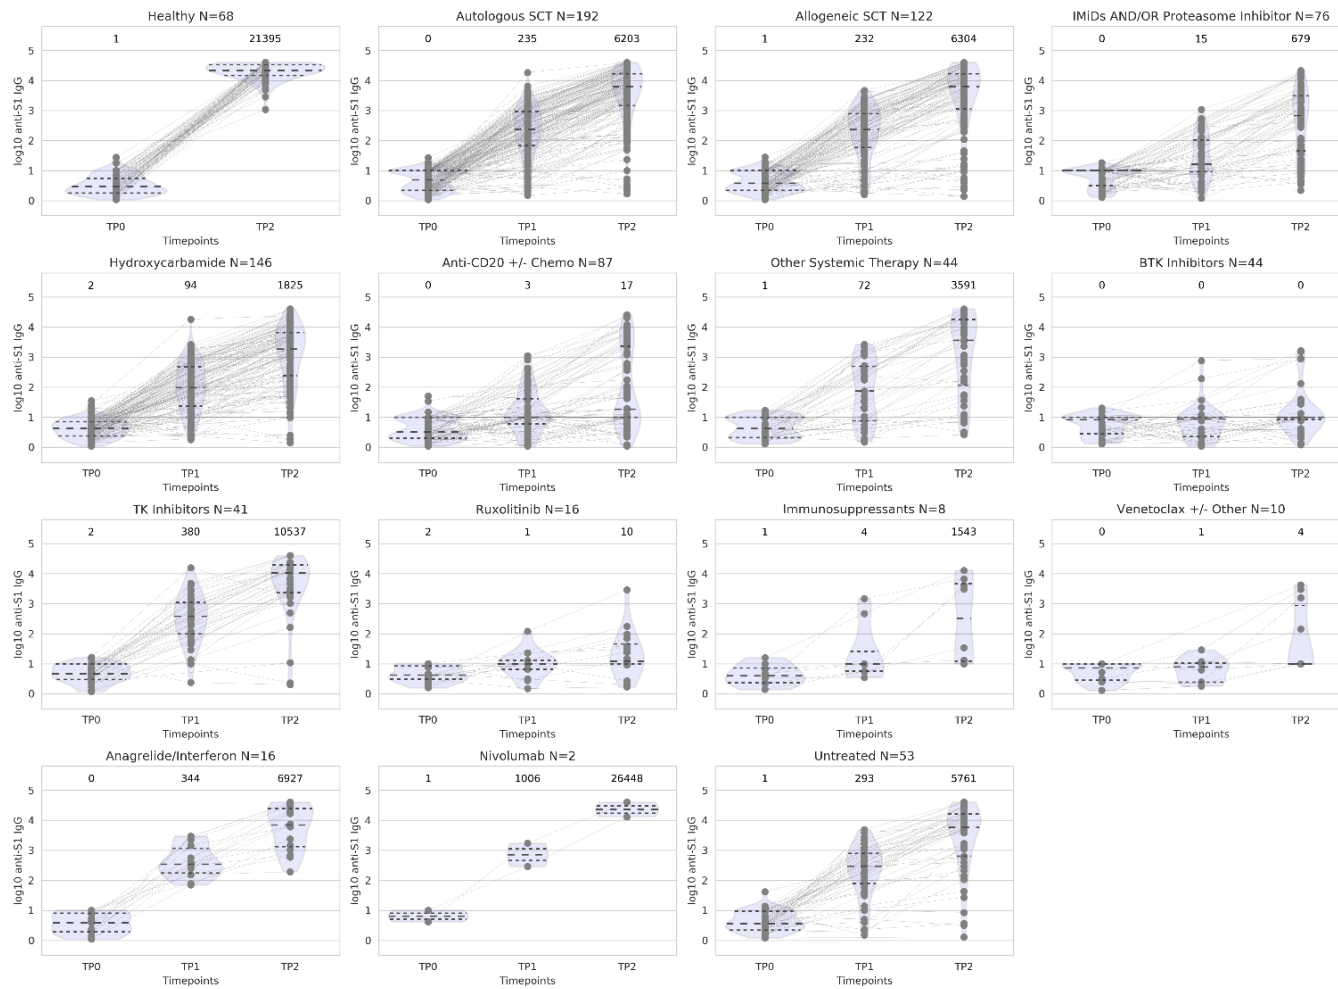

**Supplementary Figure 2. Serological response to 1 and 2 doses of BNT162b2 mRNA vaccine across different treatment groups and in healthy individuals.**

The bottom and top lines in each violin plot represent interquartile range Q1-Q3, the line in the centre of the violin plot represents the median value. The dots represent individual participants. The violin plot shows the distribution density of the data at different logarithmic anti-S1 IgG values. The median value in AU/mL is shown above each violin plot. “N” shows the number of individuals in the group. The treatment regimens of each group are listed below Table 1.



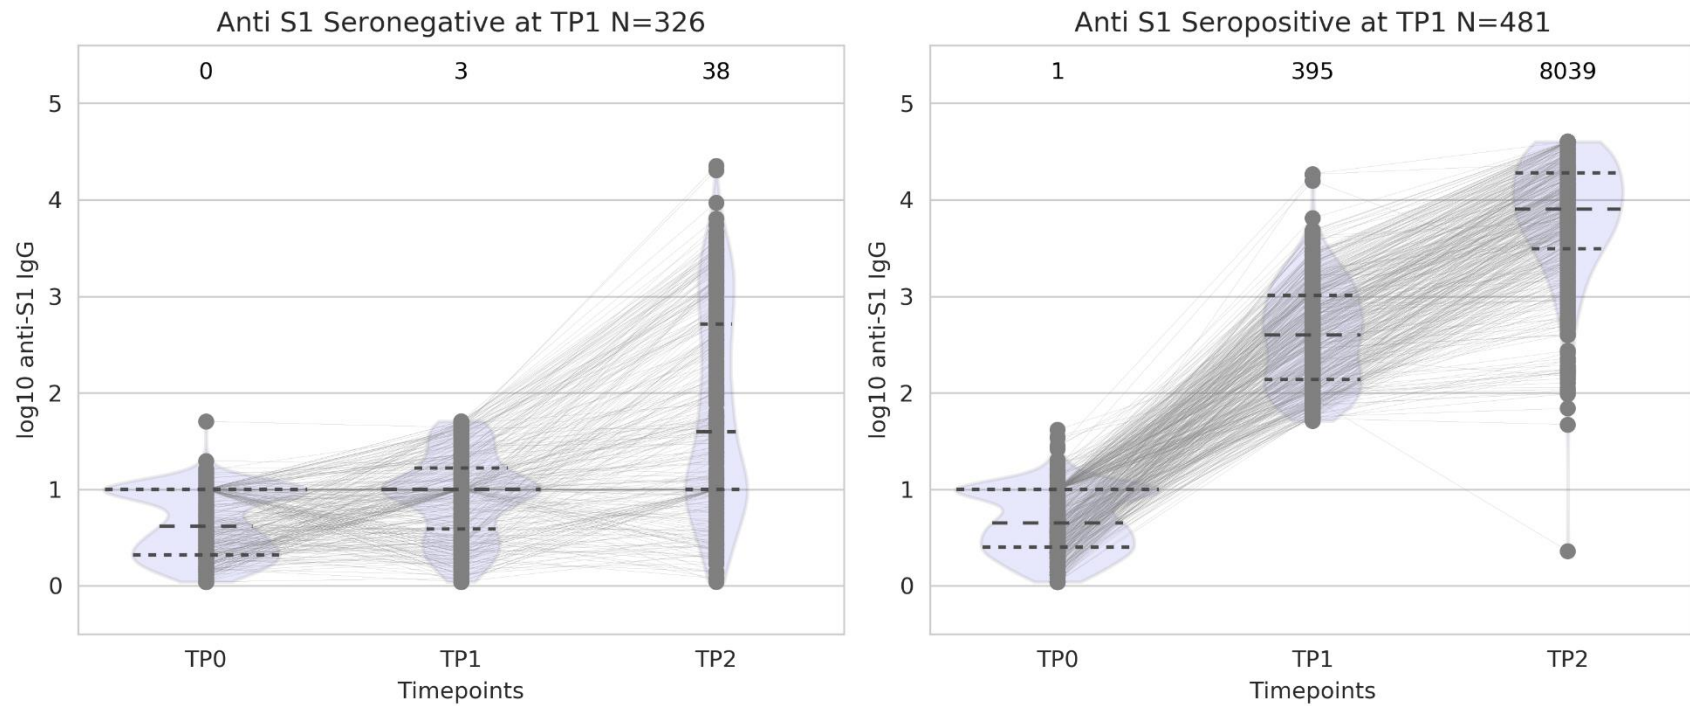

**Supplementary Figure 3. Serological response stratified by seroconversion status at TP1.**

The bottom and top lines in each violin plot represent interquartile range Q1-Q3, the line in the centre of the violin plot represents the median value. The dots represent individual participants. The violin plot shows the distribution density of the data at different logarithmic anti-S1 IgG values. The median value in AU/mL is shown above each violin plot. "N" shows the number of individuals in the group.

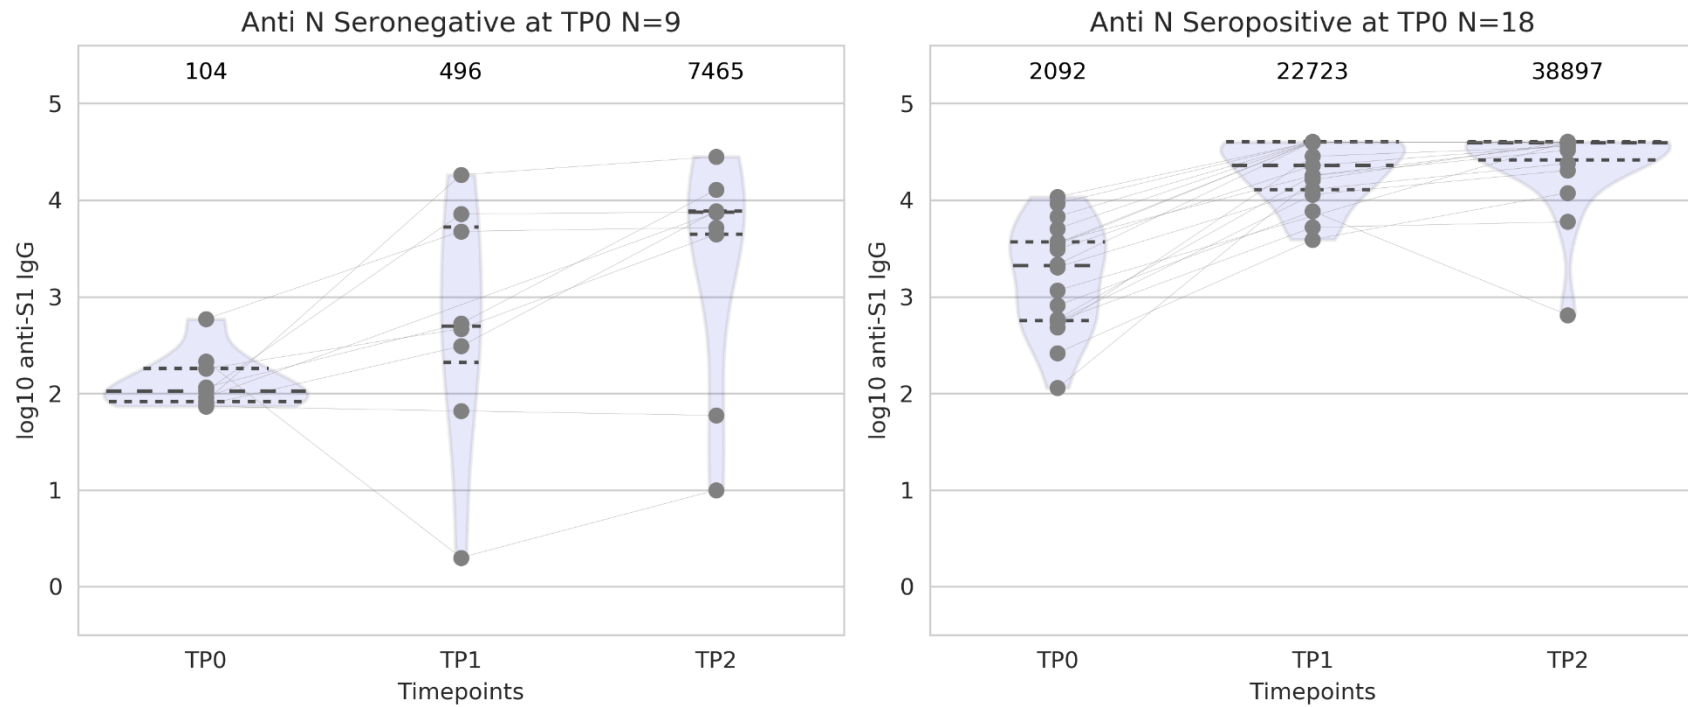

**Supplementary Figure 4. Serological response of anti-S1 IgG seropositive HMs at TP0 stratified by anti-N seropositivity at TP0.**

The bottom and top lines in each violin plot represent interquartile range Q1-Q3, the line in the centre of the violin plot represents the median value. The dots represent individual participants. The violin plot shows the distribution density of the data at different logarithmic anti-S1 IgG values. The median value in AU/mL is shown above each violin plot. “N” shows the number of individuals in the group. The anti-N seroconversion status could not be determined in one anti-S1 IgG seropositive patient at TP0.

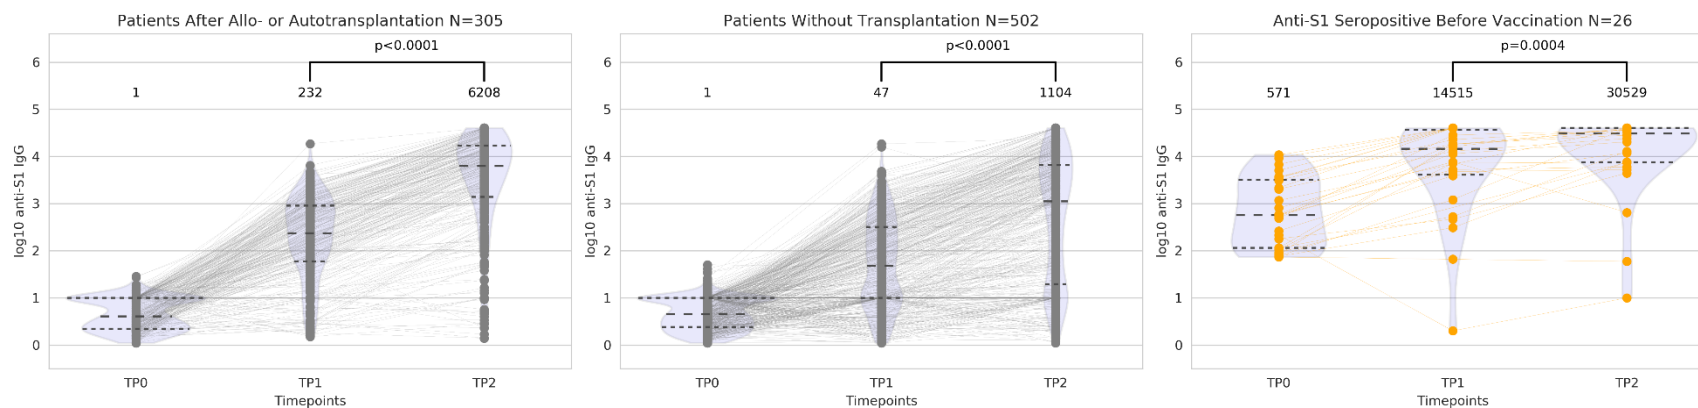

**Supplementary Figure 5. Serological response of HMs with and without SCT and anti-S1 IgG seropositive HMs at TP0.**

The bottom and top lines in each violin plot represent interquartile range Q1-Q3, the line in the centre of the violin plot represents the median value. The dots represent individual participants. The violin plot shows the distribution density of the data at different logarithmic anti-S1 IgG values. The median value in AU/mL is shown above each violin plot. “N” shows the number of individuals in the group. Twenty-six of 28 anti-S1 seropositive before vaccination subjects are presented in the violin plot, because TP1 data was not available for two individuals.

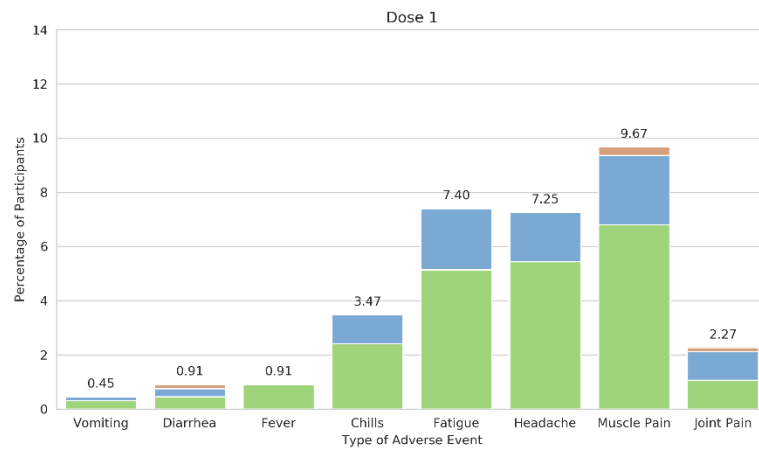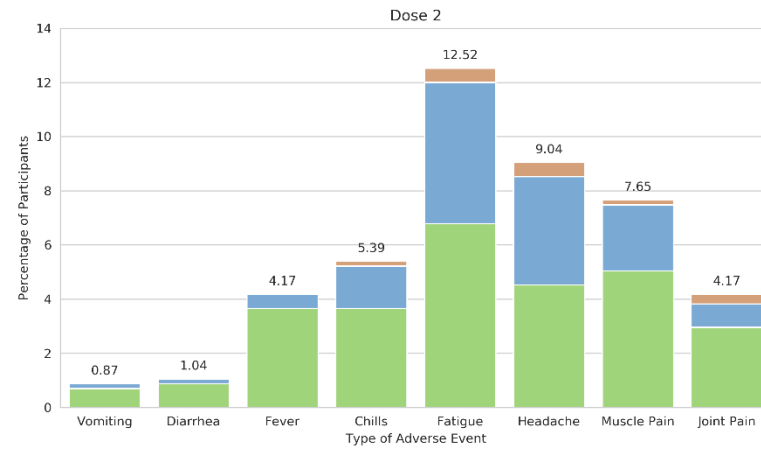

**Supplementary Figure 6. Systemic events reported within 7 days after vaccination with the first and the second dose of BNT162b2 in patients with haematological malignancies.**

The columns represent the percentage of study participants reporting systemic (green – mild/grade I, blue – moderate/grade II, orange – severe/grade III, red - potentially life-threatening/grade IV) events within 7 days after the first and the second dose of BNT162b2.
